# Supplementary material
Source: ML conference proceedings conference paper supplement (https://openreview.net/forum?id=8CILshNM4Z)

# Relación F.O. y $\alpha$

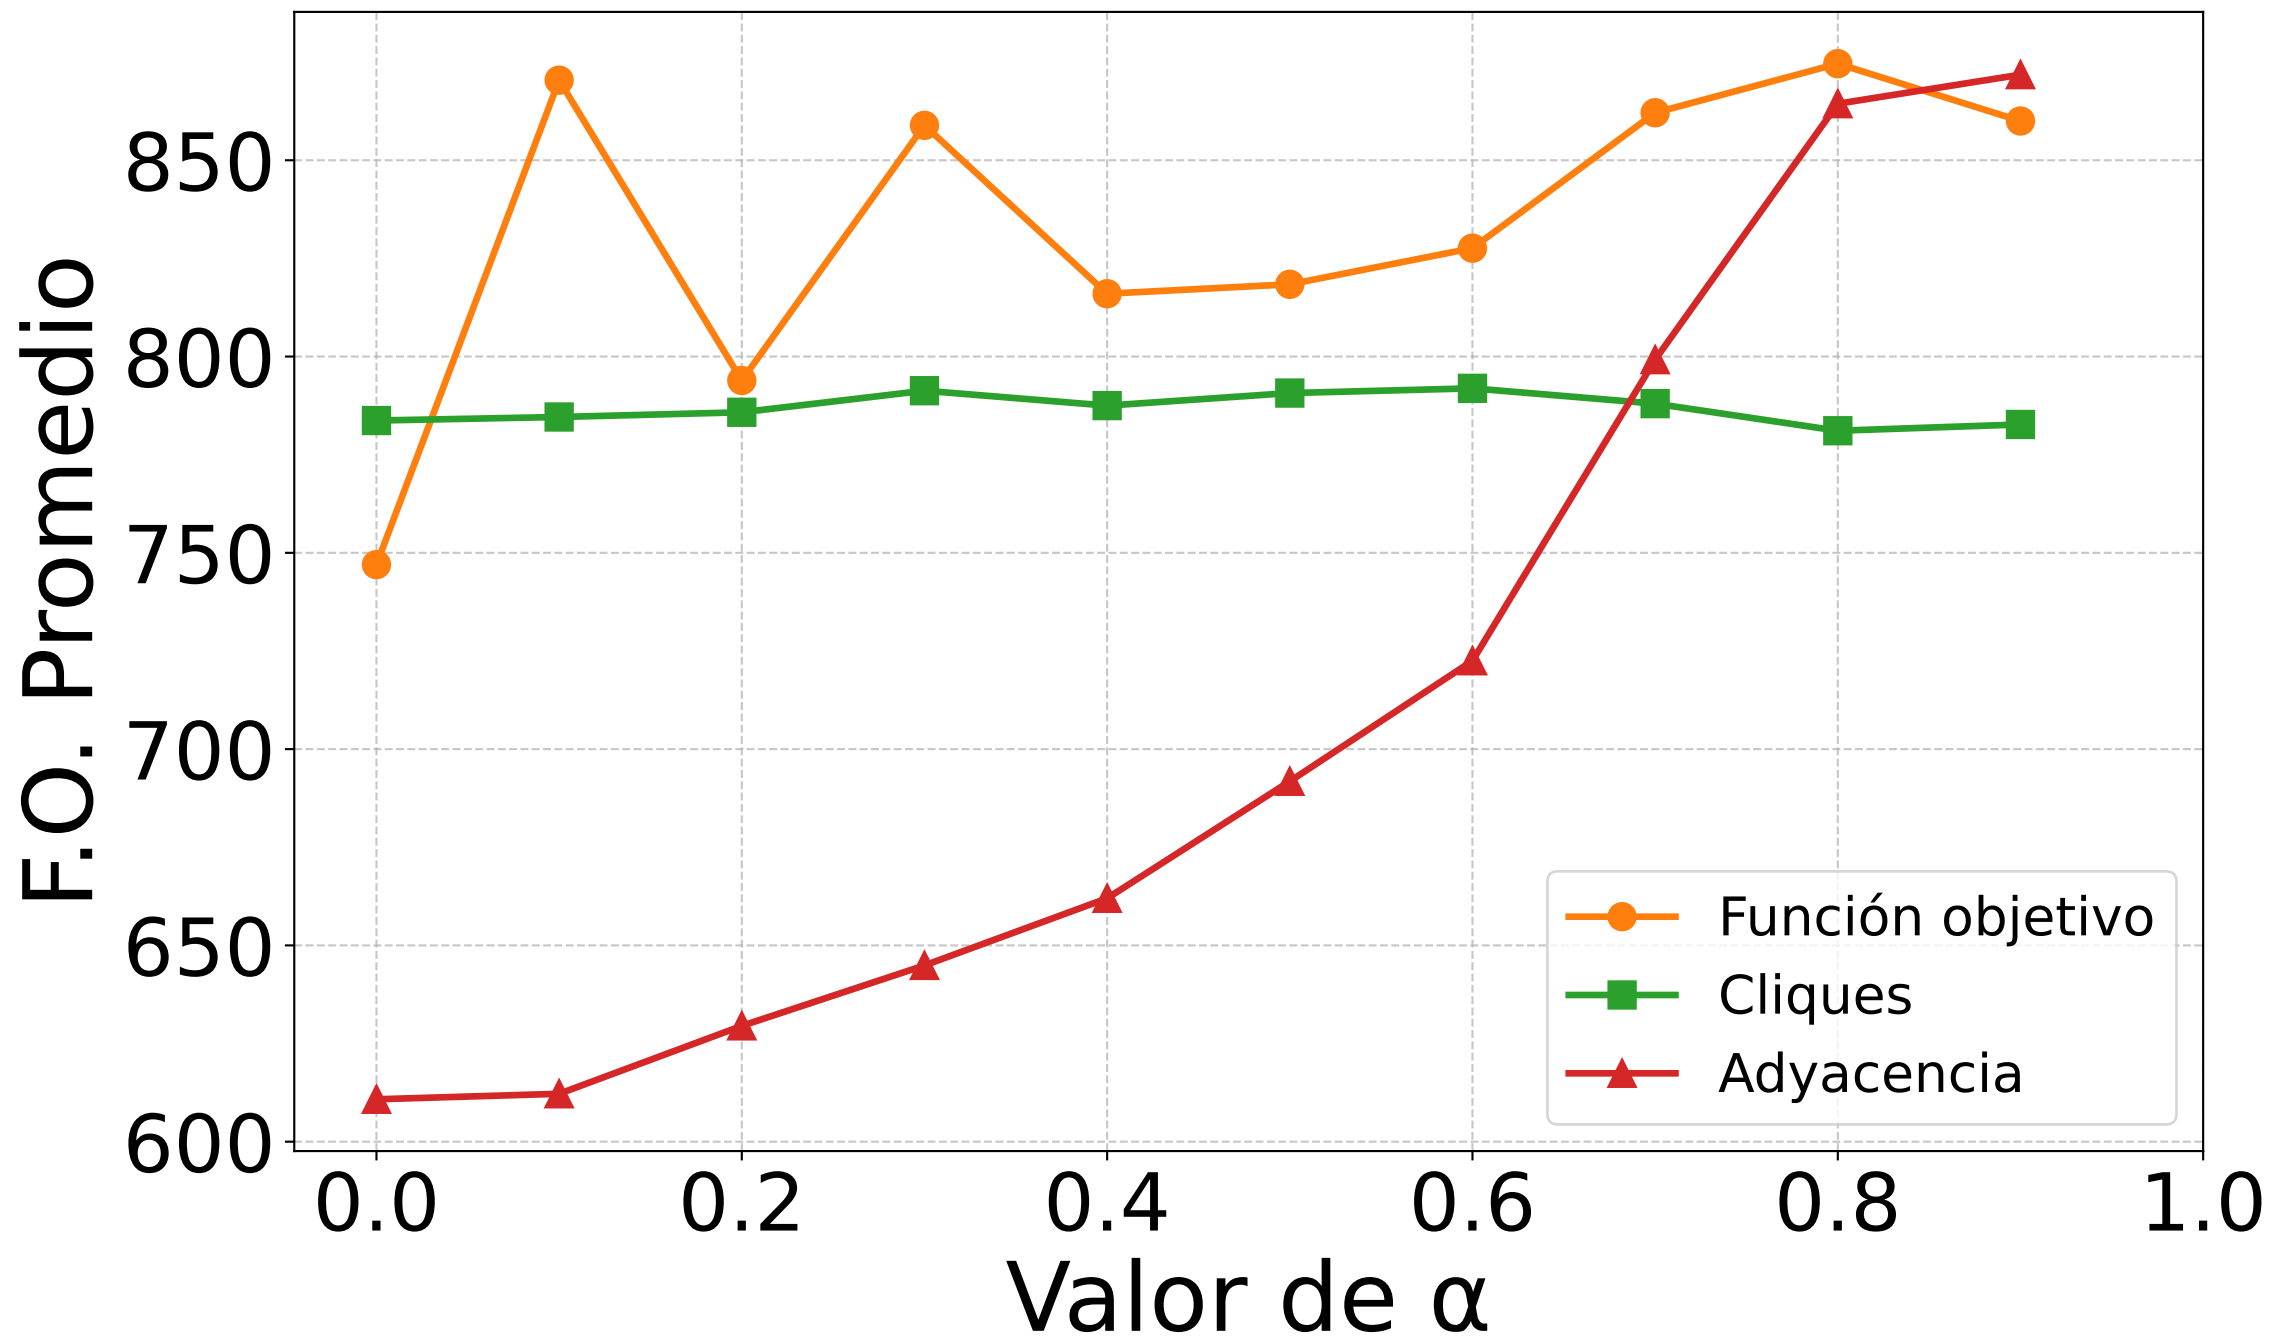

Supplement: supplementary_material [file attachment]

# Relación F.O. y $\alpha$

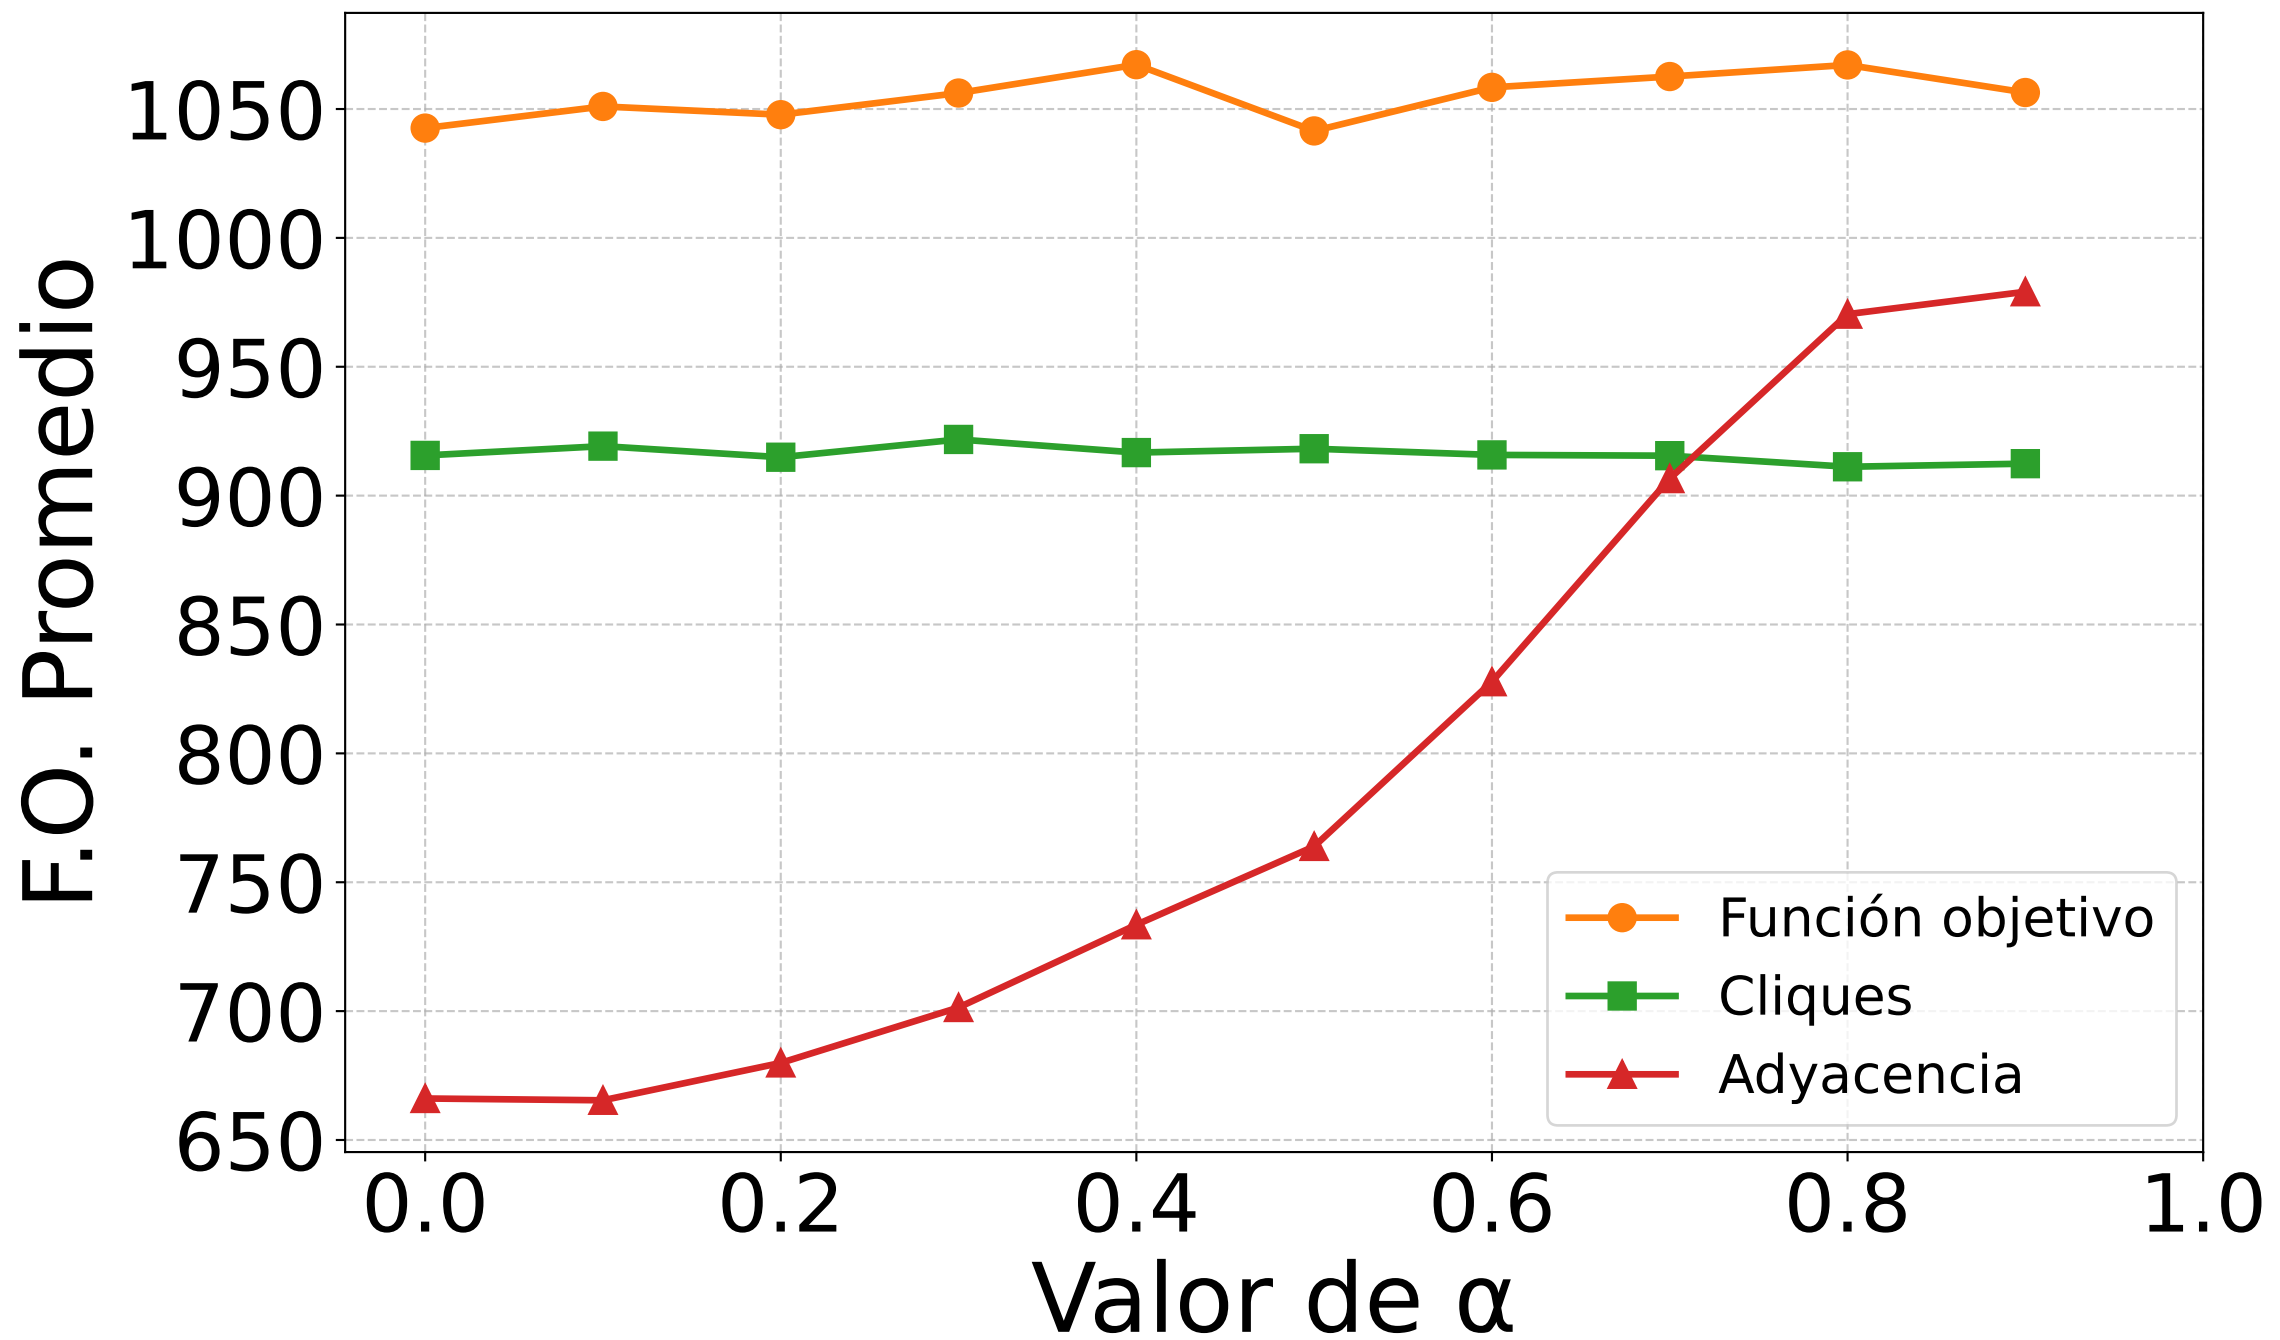

Supplement: supplementary_material [file attachment]

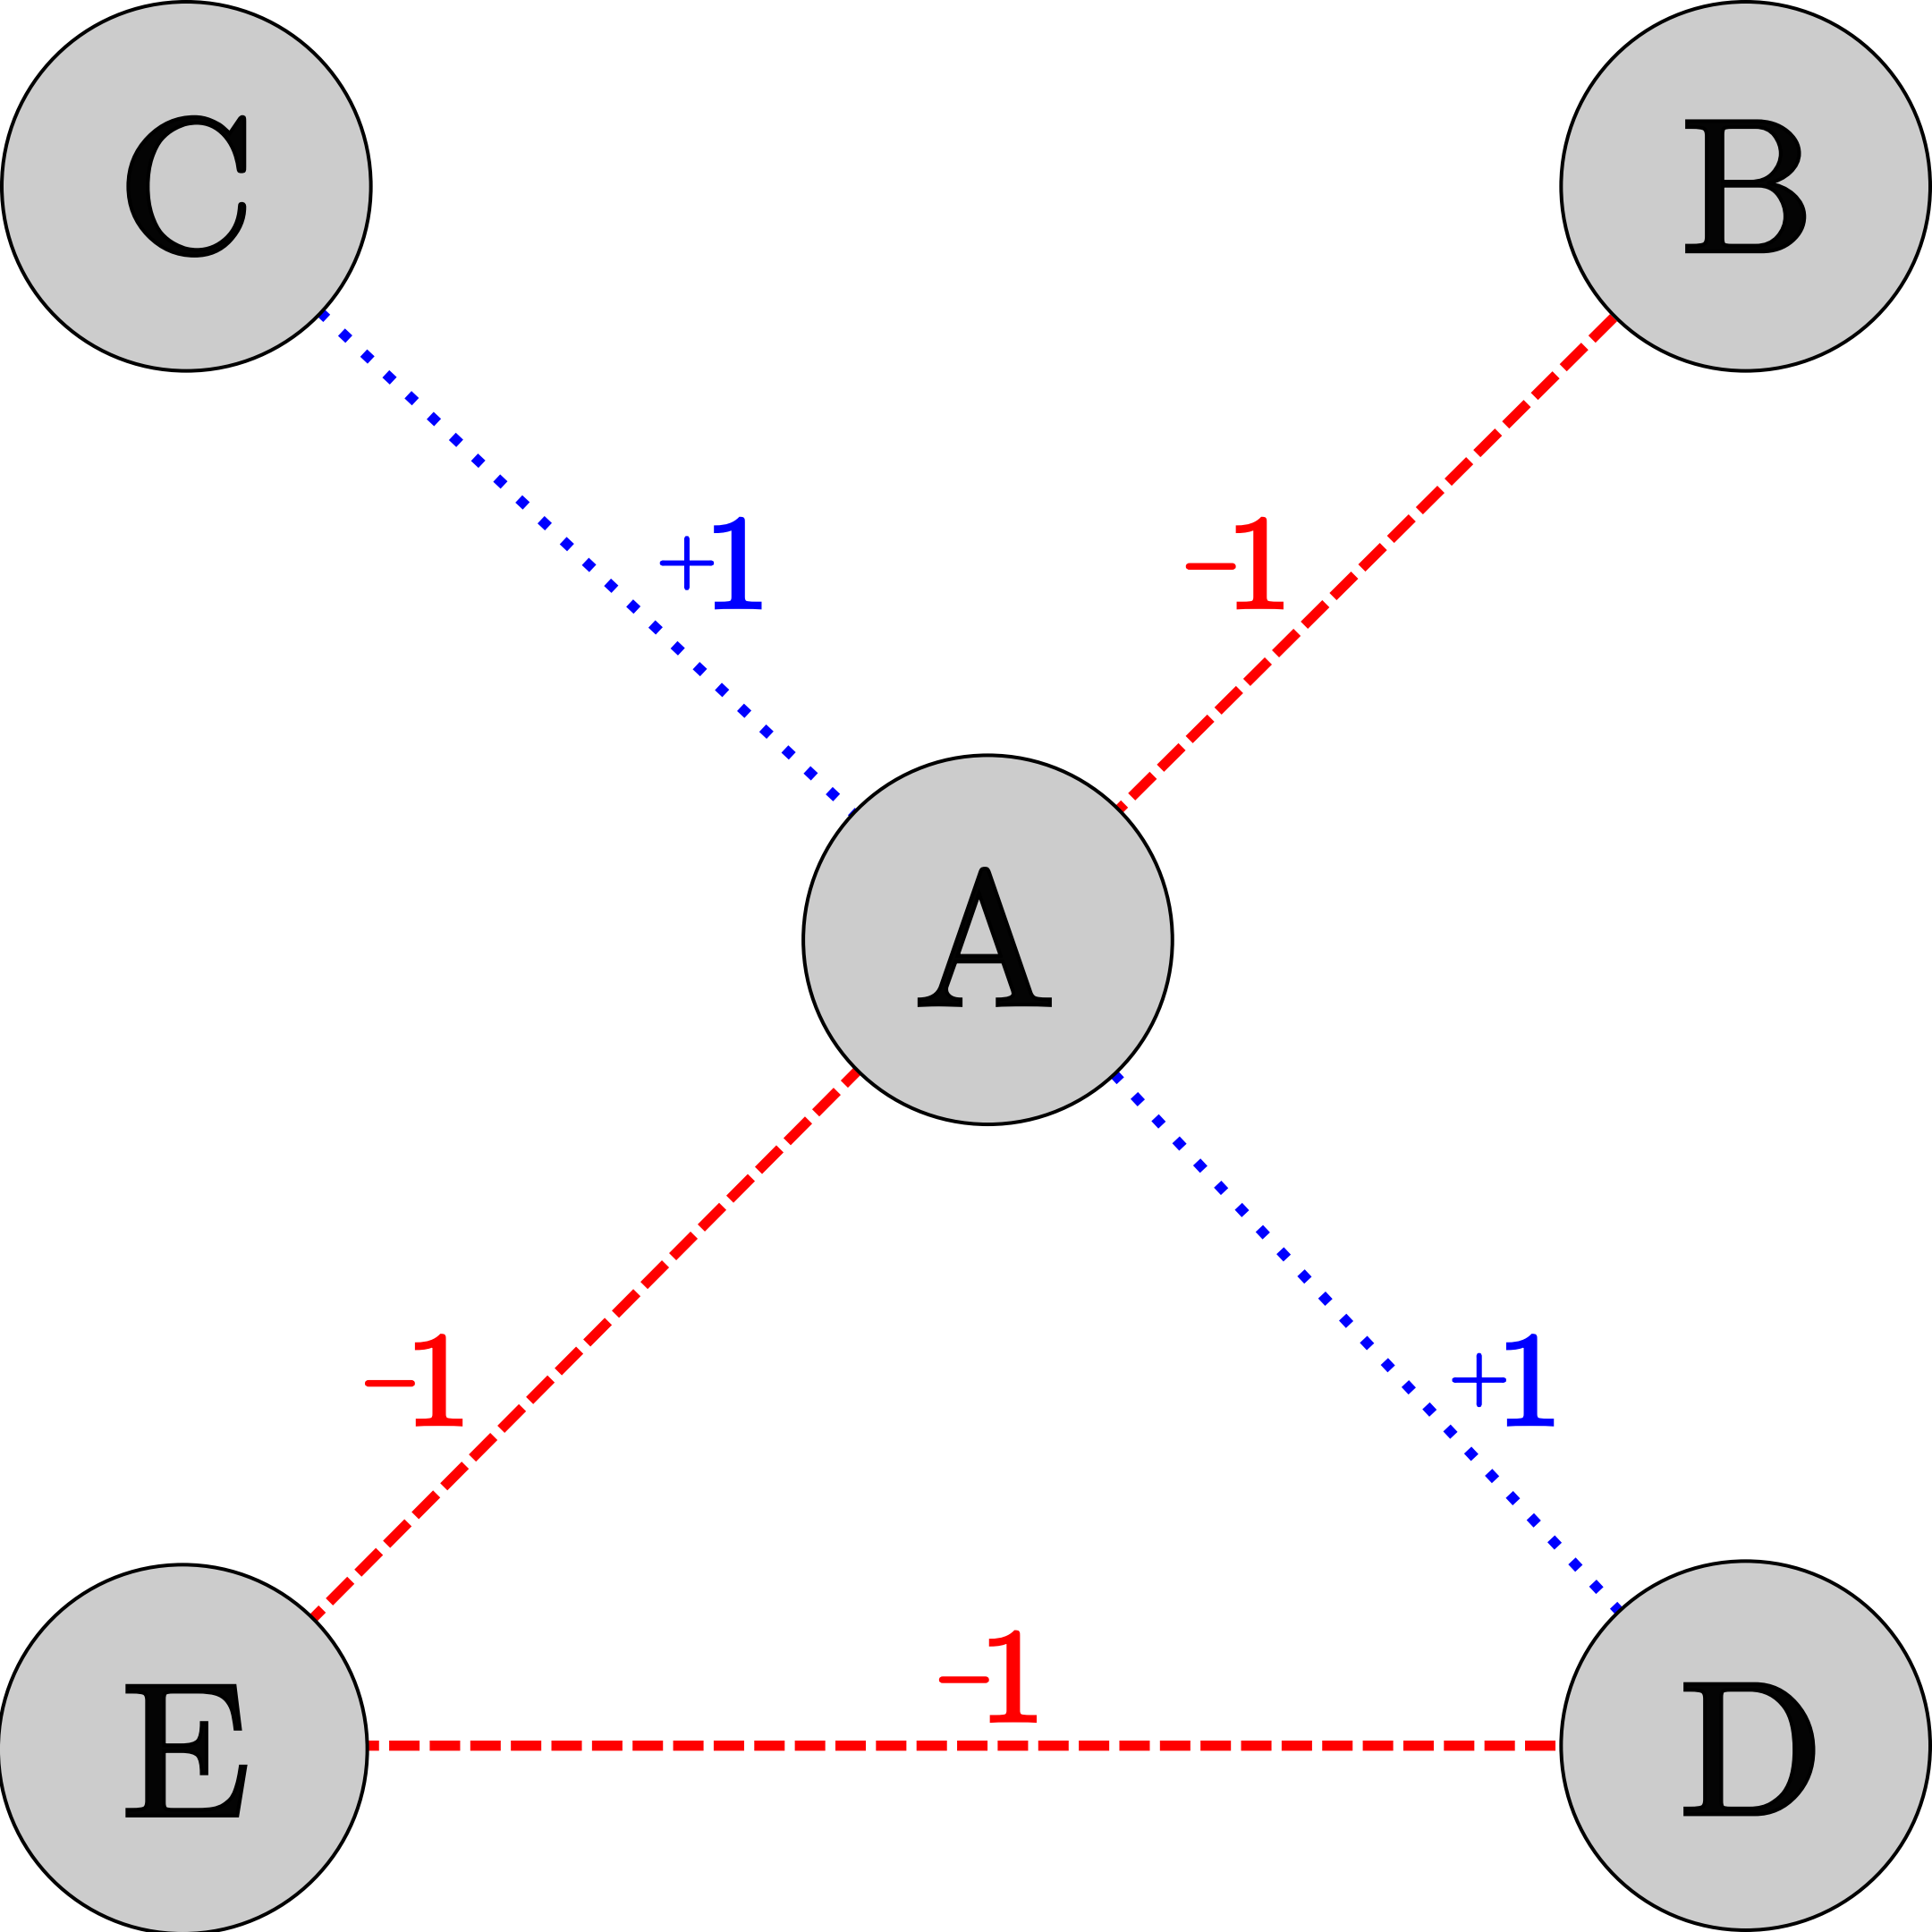

Supplement: supplementary_material [file attachment]

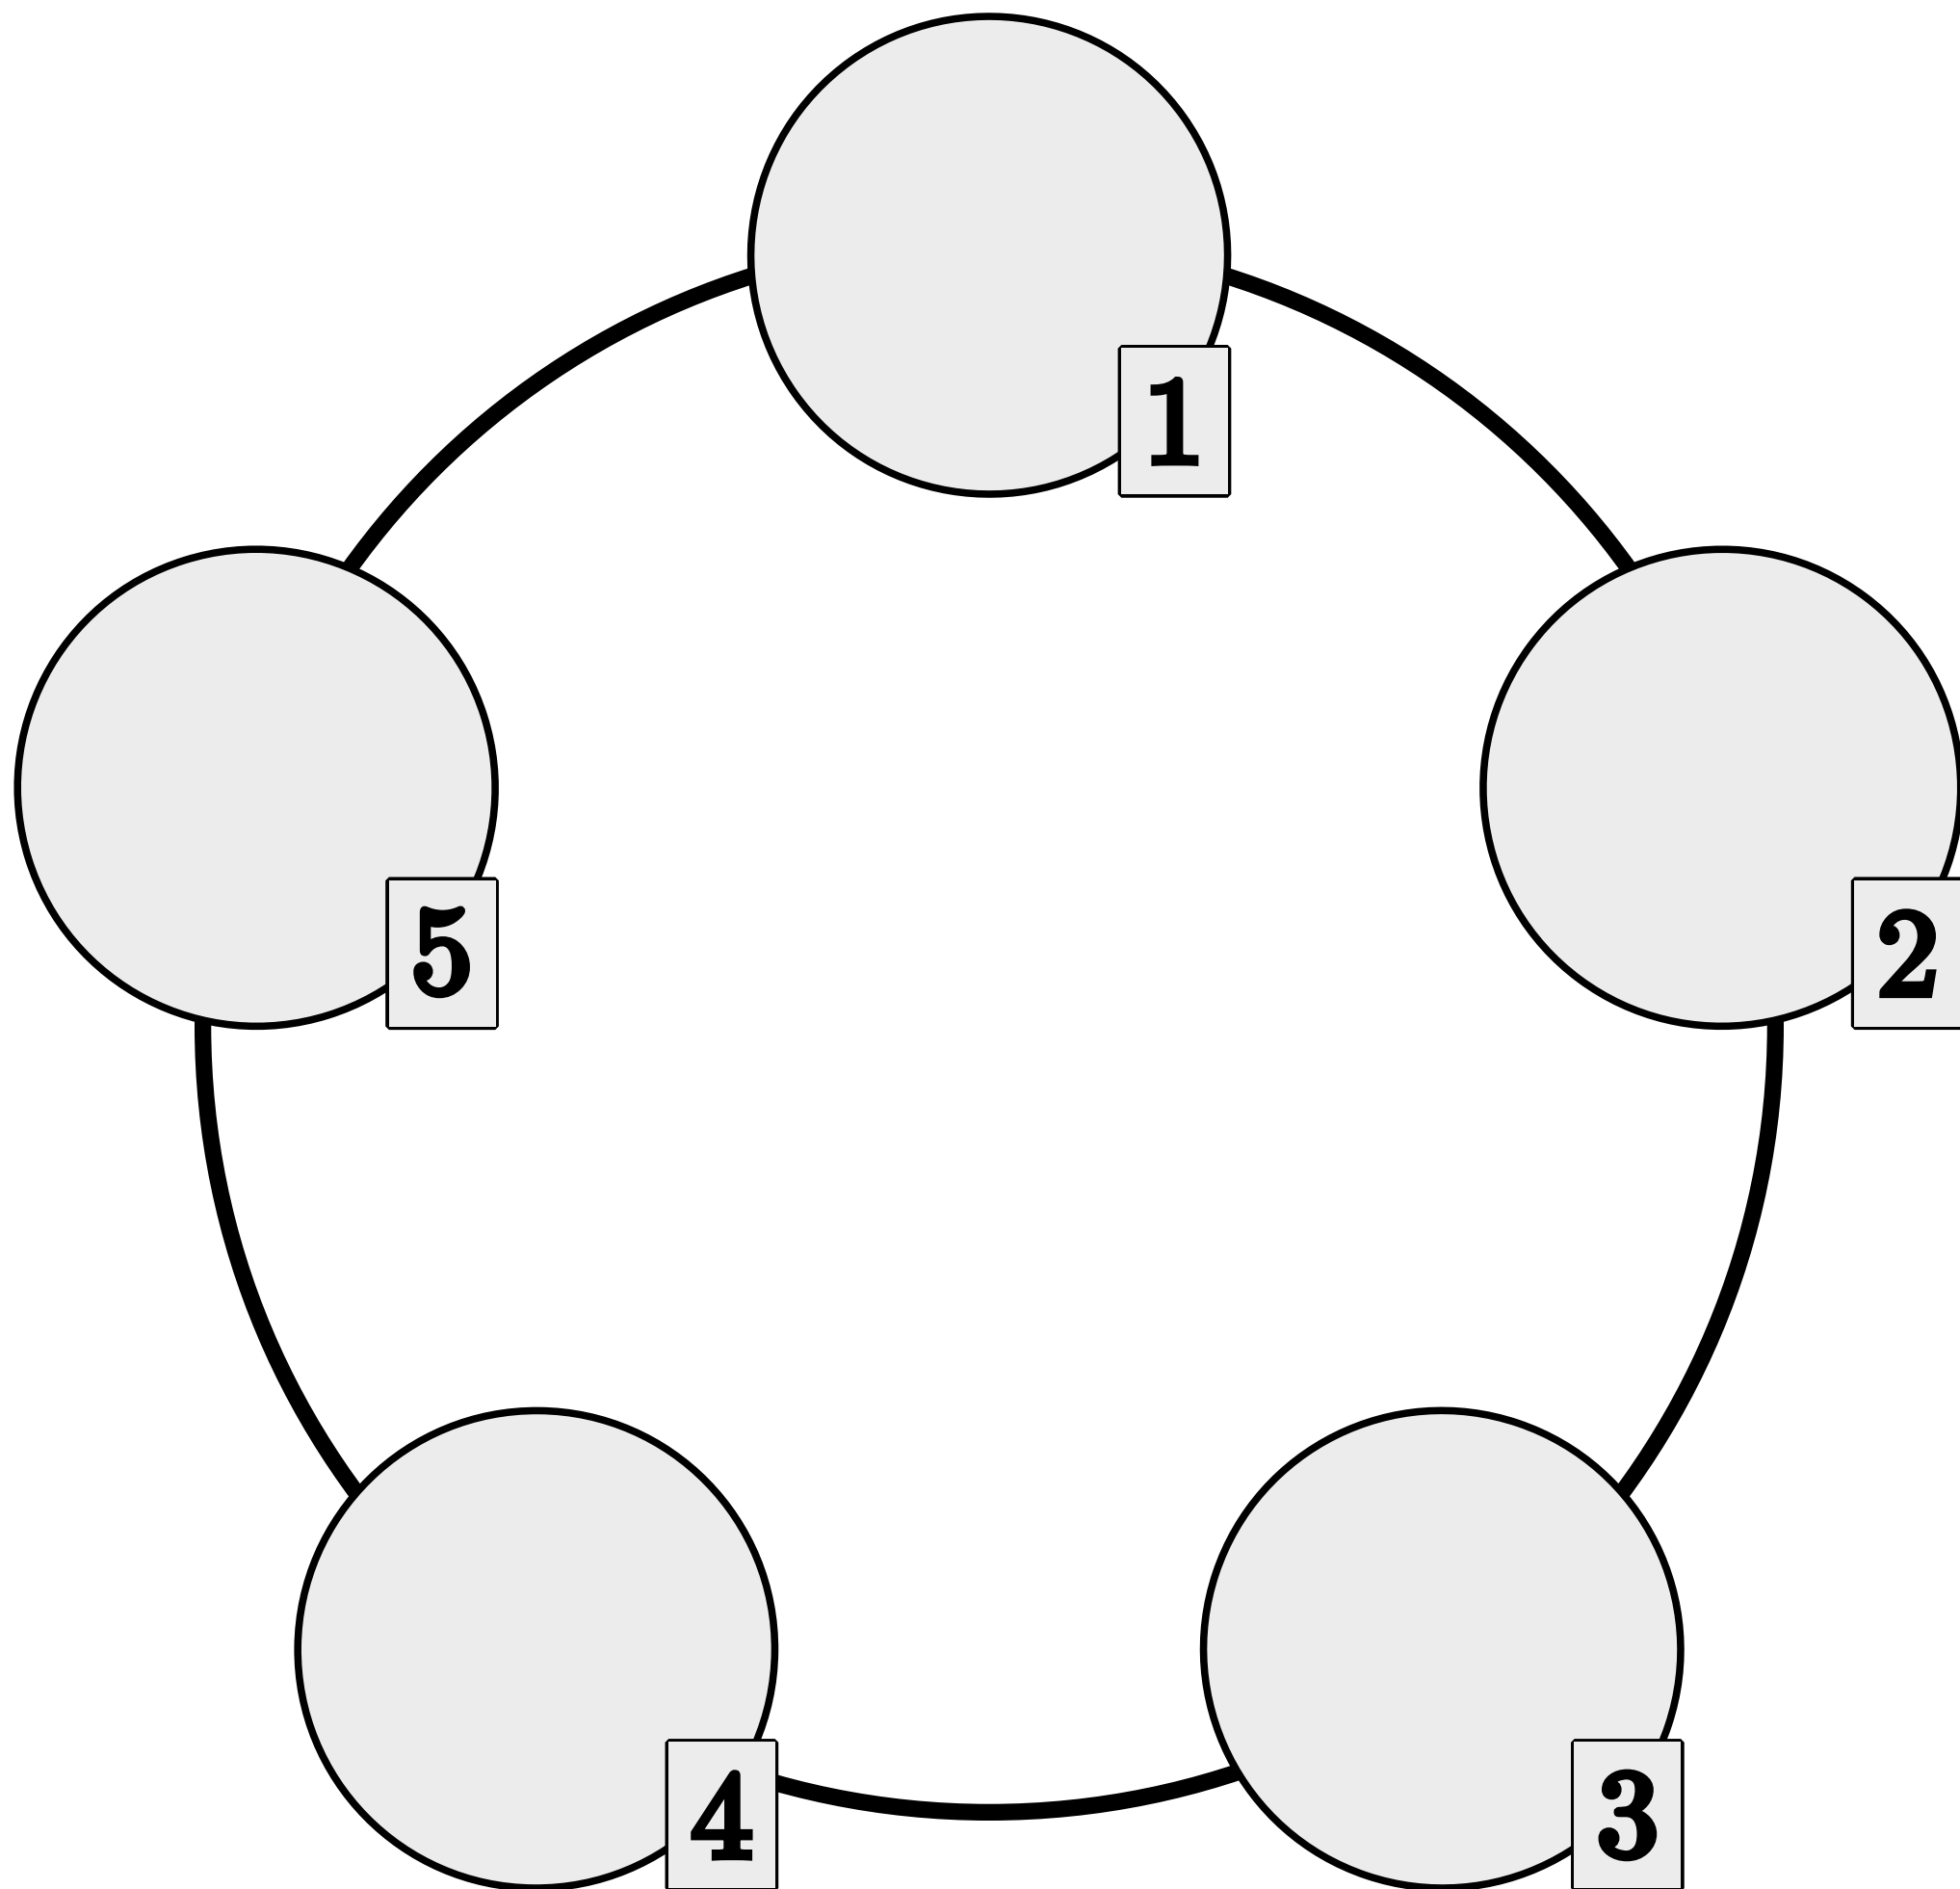

Supplement: supplementary_material [file attachment]

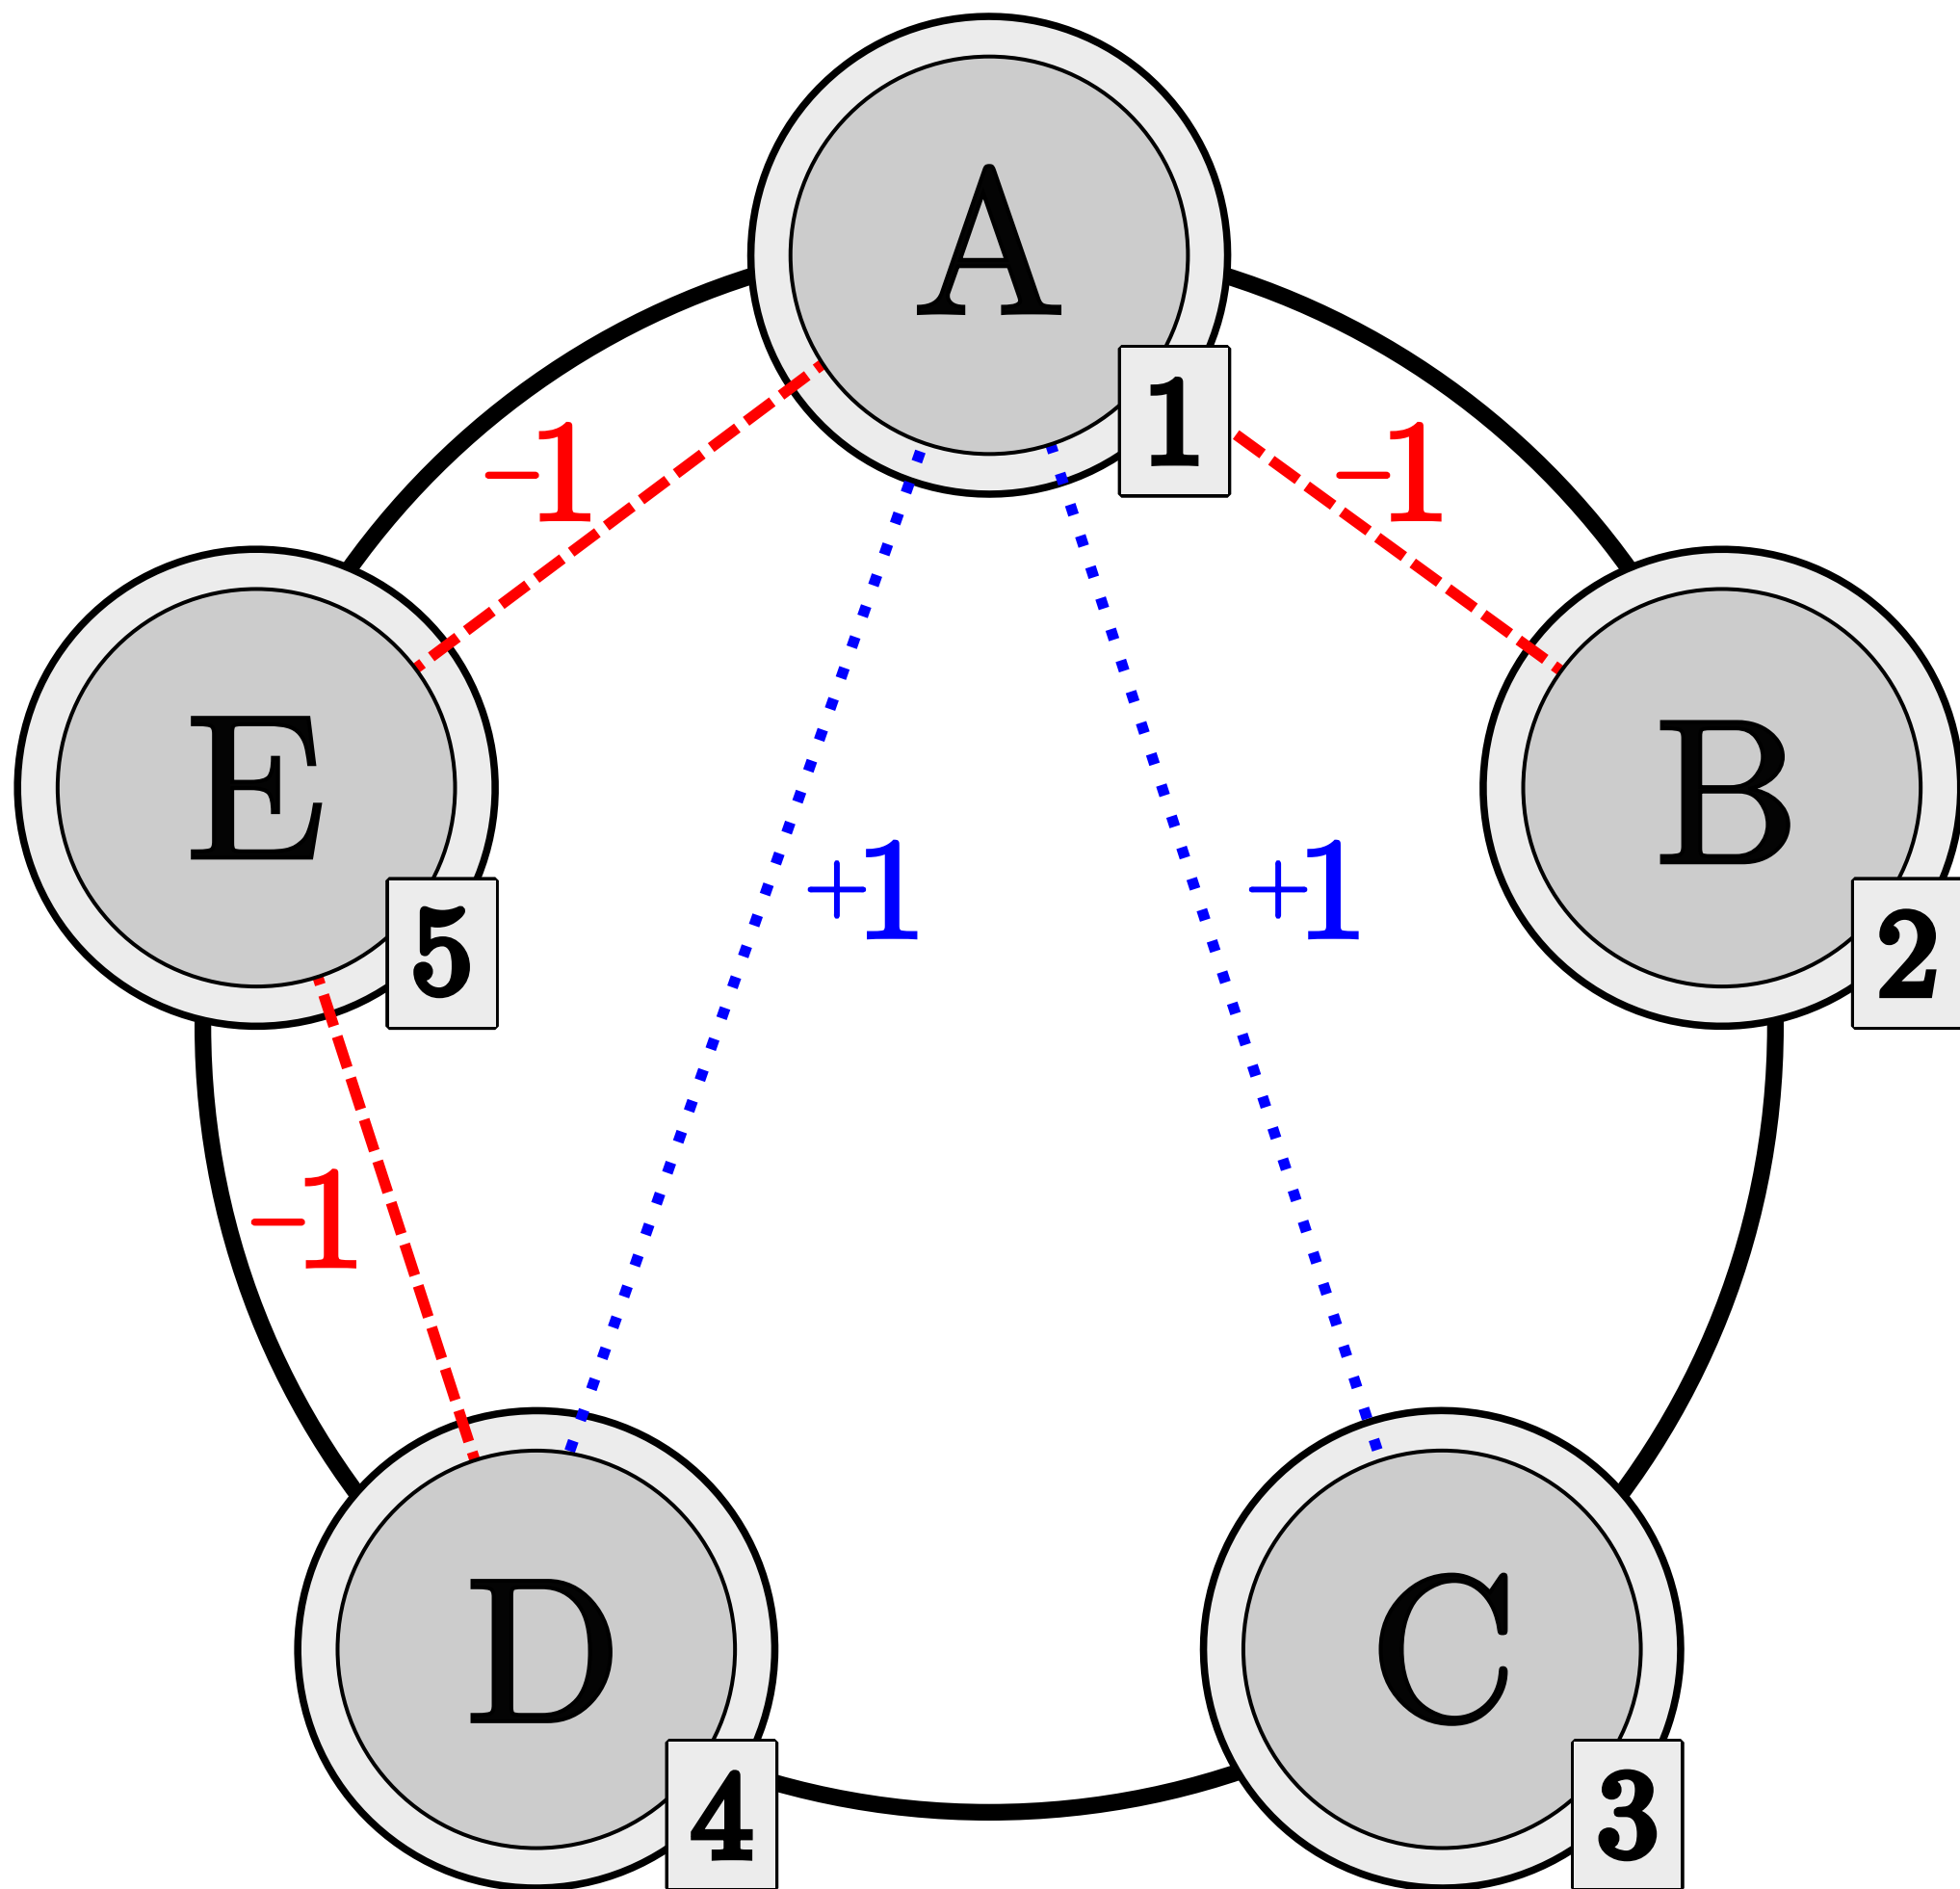

Supplement: supplementary_material [file attachment]

# Evolución temporal de la F.O.

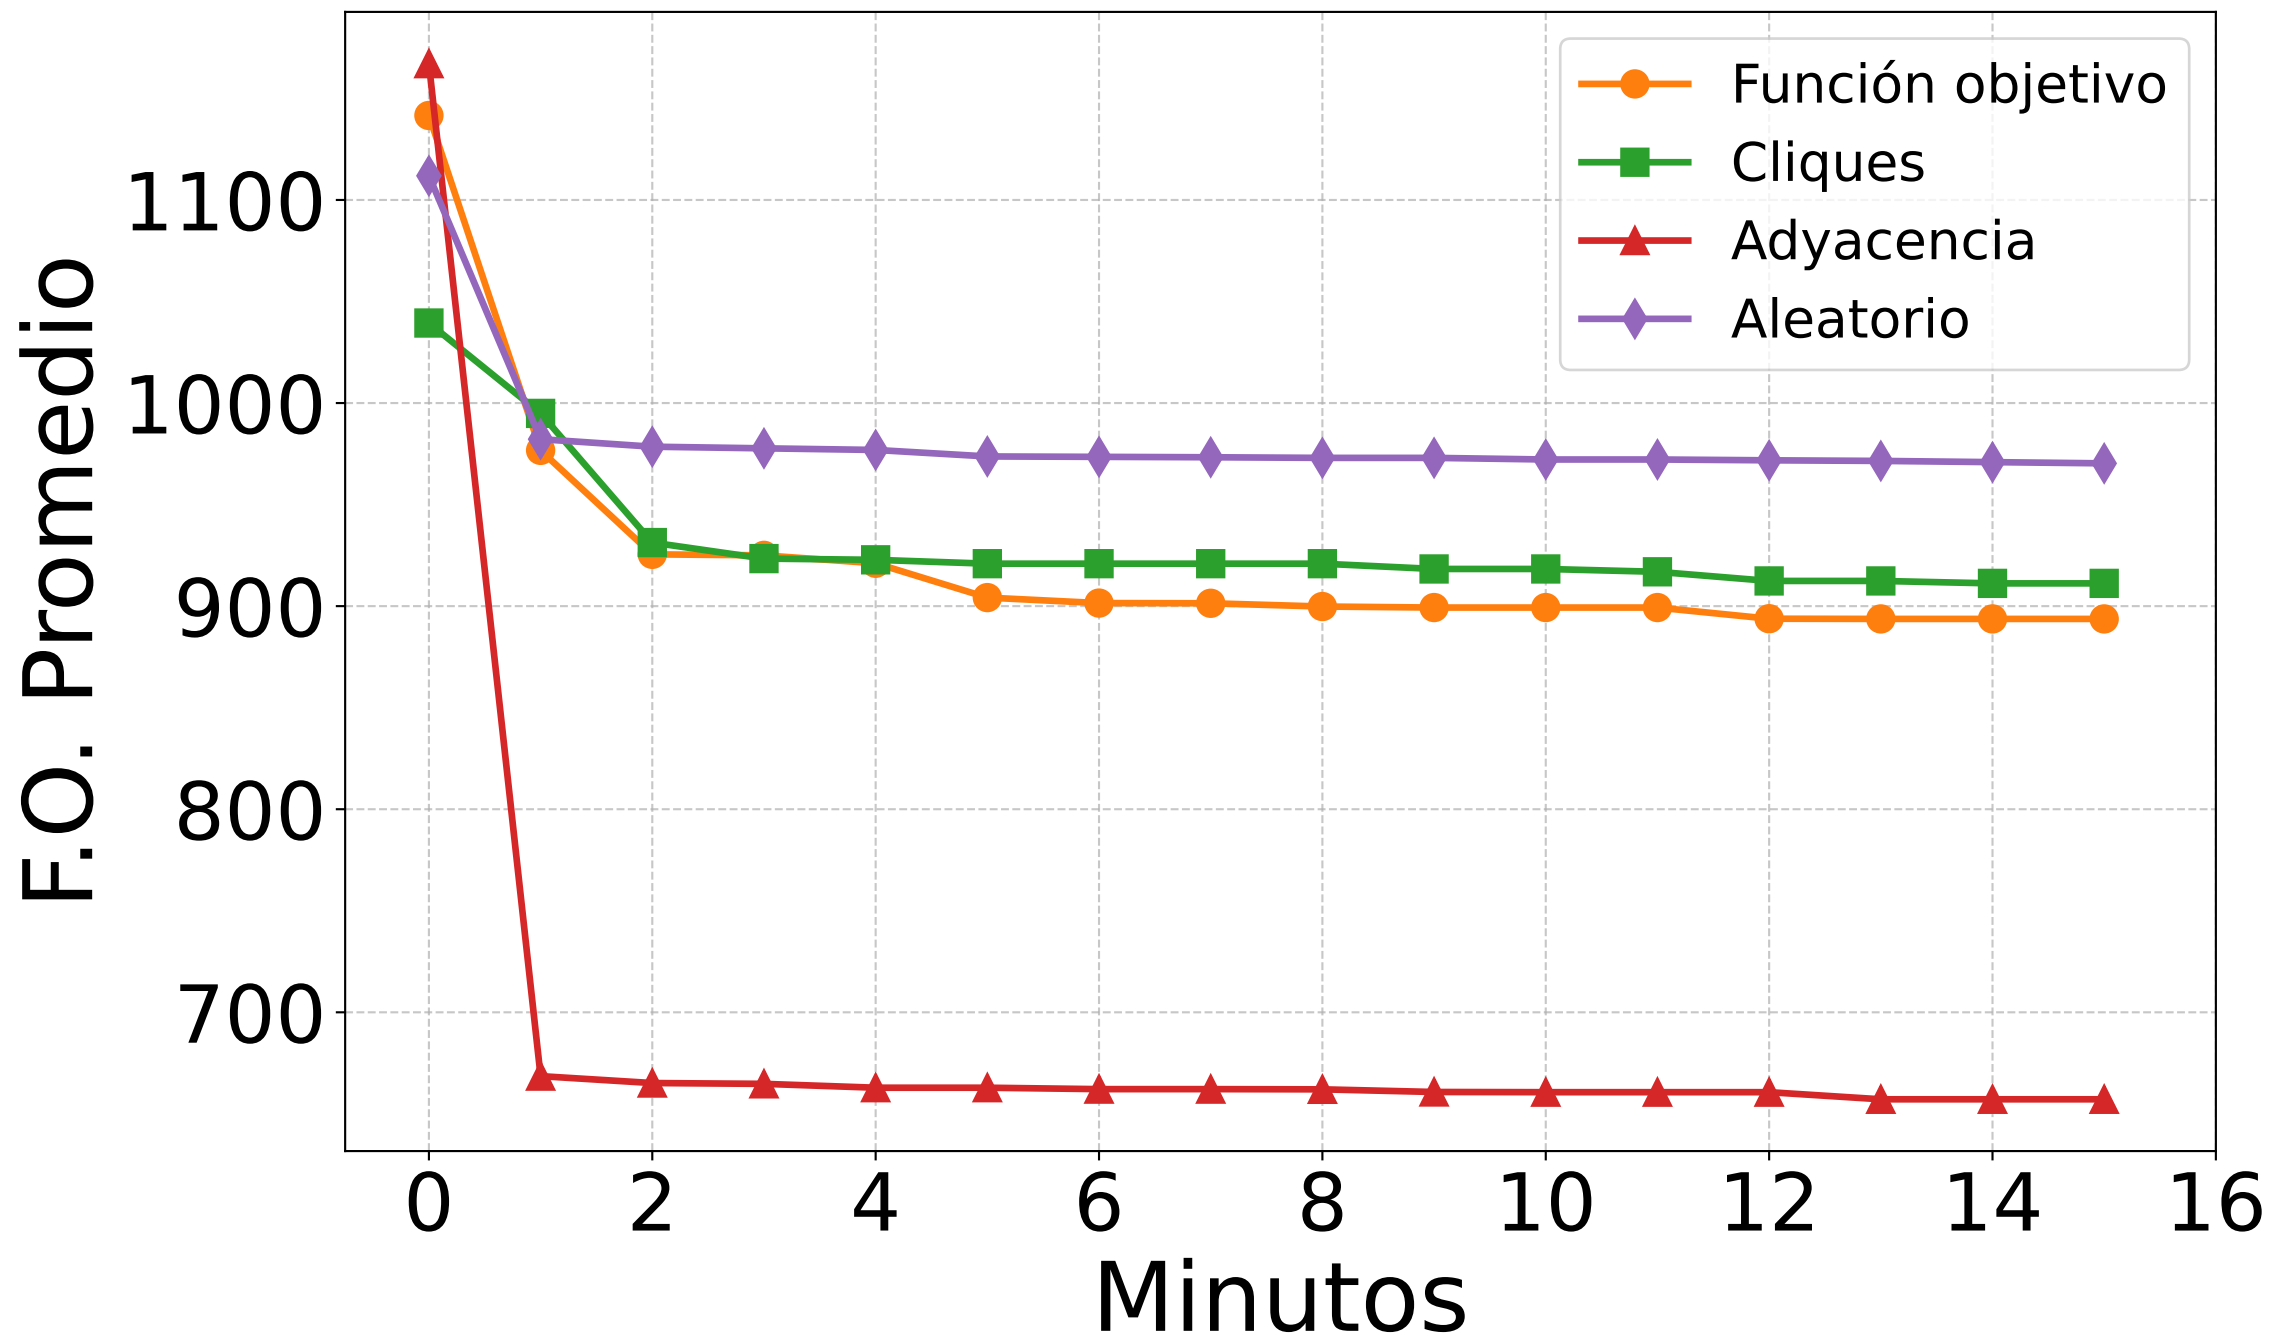

Supplement: supplementary_material [file attachment]
